# Supplementary material
Source: PubMed Central journal article supplement (PMC5369385)
Supplement: Supp_Table3.pdf [file Supp_Table3.pdf]

**Supplementary Table S3. Genome copy biodistribution 28 and 365 days following vector administration in rhesus macaques**

| Tissue                         | Vector GC biodistribution (GC/diploid genome) |          |          |         |          |          |         |         |
|--------------------------------|-----------------------------------------------|----------|----------|---------|----------|----------|---------|---------|
|                                | Day 28                                        |          |          |         | Day 365  |          |         |         |
|                                | 090-0275                                      | 090-0297 | 19,269   | 19,499  | 090-0263 | 090-0287 | 19,498  | 20,031  |
| Adrenal gland, left            | 1.2393                                        | 0.7055   | 0.2549   | 0.0361  | 0.0938   | 0.0780   | 0.2330  | 0.1910  |
| Adrenal gland, right           | 0.8945                                        | 0.6794   | 0.2864   | 0.0610  | 0.3338   | 0.1280   | 0.8471  | 0.1370  |
| Aorta (thoracic and abdominal) | 0.3823                                        | 0.2287   | 2.0733   | 0.0074  | 0.1201   | 0.0240   | 0.5424  | 0.0588  |
| Ascending aorta (proximal)     | 0.4438                                        | 0.0649   | 0.1126   | 0.0219  | 0.1090   | 0.0036   | 0.1742  | 0.0025  |
| Bone marrow, femur             | 0.9722                                        | 0.4193   | 2.2560   | 0.0639  | 0.7452   | 0.3160   | 1.3013  | 0.0869  |
| Brain, cerebellum              | 0.0057                                        | 0.0026   | 0.0086   | 0.0007  | 0.0025   | 0.0010   | 0.0030  | 0.0005  |
| Brain, cerebrum                | 0.0076                                        | 0.0107   | 0.0306   | 0.0010  | 0.0045   | 0.0013   | 0.0065  | 0.0019  |
| Esophagus                      | 0.2329                                        | 0.0634   | 0.0176   | 0.0015  | 0.0551   | 0.0112   | 0.0757  | 0.0006  |
| Eye                            | 0.0734                                        | 0.0448   | 0.1158   | 0.0014  | 0.0053   | 0.0025   | 0.0161  | 0.0035  |
| Gall bladder                   | 0.3739                                        | 5.8649   | 16.8454  | 0.0679  | 0.0624   | 0.8975   | 1.3509  | 0.5097  |
| Gross lesions                  | NC                                            | NC       | NC       | NC      | NC       | NC       | NC      | 0.0007  |
| Heart                          | 0.6972                                        | 0.5782   | 0.6803   | 0.0426  | 0.1450   | 0.0377   | 0.1557  | 0.0074  |
| Kidney, left                   | 0.1165                                        | 0.1136   | 0.9398   | 0.0187  | 0.0387   | 0.0263   | 0.0612  | 0.0265  |
| Kidney, right                  | 0.1270                                        | 0.0885   | 0.0015   | 0.0131  | 0.0304   | 0.0233   | 0.0534  | 0.0128  |
| Large intestine, colon         | 0.0342                                        | 0.0729   | 1.0453   | 0.0042  | 0.0087   | 0.0017   | 0.0167  | 0.0000  |
| Liver, caudate lobe            | 81.1779                                       | 48.5860  | 114.9740 | 11.7989 | 9.9455   | 36.9566  | 9.1185  | 20.1178 |
| Liver, left lobe               | 52.2641                                       | 51.6203  | 123.0050 | 15.2939 | 13.1707  | 47.4061  | 13.1674 | 18.8705 |
| Liver, middle lobe             | 76.2506                                       | 51.1374  | 101.0790 | 16.4268 | 26.2567  | 23.1767  | 11.2676 | 32.7139 |
| Liver, right lobe              | 38.8176                                       | 84.4106  | 134.0250 | 20.6715 | 20.1159  | 20.5713  | 13.7607 | 30.6929 |
| Lung, left                     | 0.0805                                        | 0.0551   | 0.1497   | 0.0059  | 0.0181   | 0.0054   | 0.0251  | 0.0026  |
| Lung, right                    | 0.0951                                        | 0.0436   | 0.1141   | 0.0047  | 0.0179   | 0.0038   | 0.0133  | 0.0020  |
| Lymph node, axillary           | 0.2401                                        | 0.2319   | 1.7987   | 0.2876  | 0.0373   | 0.0471   | 0.2699  | 0.9840  |
| Lymph node, inguinal           | 0.2225                                        | 0.5316   | 0.2544   | 0.3094  | 0.0254   | 0.0152   | 0.1637  | 0.0802  |
| Lymph node, mesenteric         | 0.2145                                        | 0.1246   | 1.6307   | 0.1230  | 0.0091   | 0.0302   | 0.1545  | 0.0017  |
| Lymph node, popliteal          | 0.2541                                        | 0.4373   | 1.7133   | 0.5093  | 0.0083   | 0.0144   | 0.1340  | 0.0139  |
| Muscle, quadriceps femoris     | 0.2193                                        | 0.1315   | 2.6499   | 0.0299  | 0.0610   | 0.0038   | 0.0551  | 0.1469  |
| Ovary, left                    | N/A                                           | 0.0336   | 0.5616   | N/A     | N/A      | 0.0011   | N/A     | 0.0147  |
| Ovary, right                   | N/A                                           | 0.0273   | 0.4839   | N/A     | N/A      | 0.0040   | N/A     | 0.1060  |
| Pancreas                       | 0.0306                                        | 0.0787   | 0.1048   | 0.0004  | 0.0084   | 0.0085   | 0.0212  | 0.0128  |
| Small intestine, duodenum      | 0.0249                                        | 0.0266   | 0.1080   | 0.0038  | 0.0069   | 0.0019   | 0.0024  | 0.0015  |
| Small intestine, jejunum       | 0.0163                                        | 0.0049   | 0.0943   | 0.0010  | 0.0115   | 0.0034   | 0.0082  | 0.0007  |
| Spinal Cord                    | 0.0210                                        | 0.0092   | 0.0245   | 0.0034  | 0.0114   | 0.0029   | 0.0199  | 0.0050  |
| Spleen                         | 1.8818                                        | 1.0252   | 2.3128   | 4.5529  | 0.0626   | 0.0723   | 0.1510  | 0.0336  |
| Stomach                        | 0.0188                                        | 0.0074   | 0.0560   | 0.0015  | 0.0541   | 0.0028   | 0.0022  | 0.0001  |
| Testicle, left                 | 0.0886                                        | N/A      | N/A      | 0.0003  | 0.0064   | N/A      | 0.0047  | N/A     |
| Testicle, right                | 0.0821                                        | N/A      | N/A      | 0.0003  | 0.0041   | N/A      | 0.0070  | N/A     |
| Thymus                         | 0.0047                                        | 0.0008   | 3.2419   | 0.0011  | 0.0002   | 0.0000   | 0.0014  | 0.0033  |
| Thyroid gland (w/parathyroid)  | 0.2919                                        | 0.0187   | 1.4606   | 0.0123  | 0.0086   | 0.0016   | 0.0223  | 0.0018  |
| Trachea                        | 0.0188                                        | 0.0253   | 0.1006   | 0.0029  | 0.0031   | 0.0003   | 0.0040  | 0.0013  |

Wild type and LDLR<sup>-/-</sup> rhesus macaques were injected i.v. with  $1.25 \times 10^{13}$  GC/kg AAV8.TBG.hLDLR. Following tissue harvest at necropsy, DNA was extracted, and vector biodistribution was determined.

NC, none collected; N/A, not applicable.
